1 **LRIT3 is required for nyctalopin expression and normal ON and OFF pathway signaling in the**  
2 **retina**

3  
4 Nazarul Hasan<sup>1</sup>, Gobinda Pangeni<sup>2</sup>, Thomas A. Ray<sup>1</sup>, Kathryn M. Fransen<sup>2</sup>, Jennifer Noel<sup>2</sup>, Bart G.  
5 Borghuis<sup>3</sup>, Maureen A. McCall<sup>2,3</sup>, Ronald G. Gregg<sup>1,2</sup>

6  
7 Abbreviated title: LRIT3 is required for normal retinal function

8  
9 <sup>1</sup>Department of Biochemistry and Molecular Genetics,  
10 <sup>2</sup>Department of Ophthalmology and Visual Sciences,  
11 <sup>3</sup>Department of Anatomical Sciences and Neurobiology,  
12 University of Louisville, Louisville, KY 40292.

13  
14 Corresponding Author:  
15 Ronald G. Gregg  
16 Department of Biochemistry and Molecular Genetics  
17 University of Louisville  
18 319 Abraham Flexner Way  
19 Louisville, KY 40292  
20 email: [ron.gregg@louisville.edu](mailto:ron.gregg@louisville.edu)

21  
22  
23 Number of pages: 32  
24 Number of figures (6), tables (1), extended Figures (1):  
25 Number of words  
26 Abstract: 225  
27 Introduction: 677  
28 Discussion: 929

29  
30 Conflict of Interest: The authors declare no competing financial interests.

31  
32 Acknowledgements: This work was supported by funding from the National Institutes of Health (R01  
33 EY12354 (RGG, MAM); R01 EY014701 (MAM), R01 EY028188 (BGB) and an unrestricted grant from  
34 Research to Prevent Blindness to the University of Louisville.

36 **ABSTRACT**

37  
38 At its first synapse, the retina establishes two parallel channels that encode light increments (ON) or  
39 decrements (OFF). At the same synapse, changes in photoreceptor glutamate release are sensed by  
40 ON bipolar cells (BCs) via the metabotropic glutamate receptor 6 (mGluR6), and OFF BCs via  
41 ionotropic BCs, which differ in their synaptic configuration with the photoreceptor terminal. ON BCs  
42 form invaginating synapses that bring them in close proximity to presynaptic ribbons and the presumed  
43 sole source of glutamate release. OFF bipolar cells form flat contacts distal to the ribbon synapse. We  
44 investigated the role of LRIT3 in normal assembly and function of the mGluR6 signaling cascade  
45 present in ON BCs. We demonstrate that LRIT3 is required for nyctalopin expression and thus TRPM1  
46 expression and function. Using glutamate imaging, whole-cell electrophysiology, and multi-electrode  
47 array extracellular recordings we demonstrate that the loss of LRIT3 impacts both the ON and OFF  
48 pathways at the level of the BCs. The effect on ON pathway signaling, a lack of ON BC response, is  
49 shared by mutants lacking mGluR6, TRPM1 GPR179 or nyctalopin. The effects on the OFF pathway  
50 are unique to LRIT3, and include a decrease in response amplitude of both OFF BC and GCs. Based  
51 on these results, we propose a working model where LRIT3 is required for either efficient glutamate  
52 release or reuptake from the first retinal synapse.

53

54 **SIGNIFICANCE STATEMENT**

55  
56 At the first visual synapse, photoreceptor cells signal to two distinct bipolar cell (BC) populations, one  
57 characterized by a depolarizing response to light onset (ON or DBCs), the other by a hyperpolarizing  
58 response (OFF or HBCs). The DBC light response depends on a G protein-coupled receptor and  
59 associated protein complex, known as the signalplex. Mutations in signalplex proteins lead to DBC  
60 pathway-specific loss of visual function. Here we show how loss of LRIT3, a previously identified  
61 signalplex protein, prevents functional assembly of the DBC signalplex and alters visual function in both

62 ON and OFF signaling pathways. Thus, our results indicate that the function of LRIT3 at this first  
63 synapse extends beyond assembly of the DBC signalplex.

64 **INTRODUCTION**

65

66 Light signaling is initiated in the retina when photoreceptors detect a luminance increase, hyperpolarize,  
67 and decrease tonic glutamate release. Several types of bipolar cells (BCs) detect this signal and  
68 establish several parallel information channels. First, the dichotomy of rod and cone photoreceptor light  
69 sensitivity creates channels that encode visual signals under dim and bright illumination, and signal  
70 through rod and cone BCs, respectively. Second, a difference in the glutamate receptors expressed by  
71 rod and cone ON bipolar cells (mGluR6; (Kaneko and Saito, 1983; Saito and Kaneko, 1983; Slaughter  
72 and Miller, 1983; Borghuis et al., 2014)) vs. OFF BCs (AMPA/kainate; (Kaneko and Saito, 1983; Saito  
73 and Kaneko, 1983; Slaughter and Miller, 1983; DeVries and Schwartz, 1999; Borghuis et al., 2014;  
74 Ichinose and Hellmer, 2016)) causes a light increment to depolarize ON BCs (ON BCs) while  
75 hyperpolarizing OFF BCs (HBCs).

76 There are distinct differences in the anatomical configuration of the synapse of these three BC classes.  
77 Two rod BC dendrites along with two flanking horizontal cell processes form a central invaginating  
78 profile in rod photoreceptor spherules. These are opposed to an electron dense ribbon with closely  
79 associated vesicles on the presynaptic side of the synapse. Similarly, a central cone ON BC process  
80 flanked by two horizontal cell processes form invaginating profiles in cone pedicles, again opposed to  
81 presynaptic ribbons. In contrast, HBCs form flat contacts distal to the invaginating ribbon synapse on  
82 these same cone photoreceptors (see review by (Wassle et al., 2009)).

83 Mutations affecting rod photoreceptor presynaptic proteins that govern glutamate release generally  
84 disrupt the invaginating synapse, ribbon structure, and presumably glutamate release. These  
85 presynaptic disruptions are correlated with ectopic extensions of BC and HC dendrites that course  
86 through almost all of the ONL (Mansergh et al., 2005) (Chang et al., 2006) (Ball et al., 2002; Haeseleer  
87 et al., 2004; Wycisk et al., 2006). In contrast, most mutations affecting postsynaptic ON BC proteins that  
88 govern postsynaptic signal transduction disrupt light signaling but do not alter the morphology of the  
89 invaginating ribbon synapse (Masu et al., 1995; Ball et al., 2003; Morgans et al., 2009; Koike et al.,

90 2010; Peachey et al., 2012; Neuille et al., 2017). These DBC signaling complex components, hereafter  
91 referred to as the DBC signalplex, include mGluR6, TRPM1, GPR179, nyctalopin, RGS7, RGS11,  
92 R9AP, Gα0, Gβ13, Gβ5 and LRIT3.  
93 Most studies have found that the dependence-hierarchy of DBC signalplex protein expression and  
94 functional interactions within the signalplex are similar in rod and cone DBCs. For example, TRPM1  
95 expression depends on expression of nyctalopin (Pearing et al., 2011) and GPR179, the latter  
96 modulating the sensitivity of the DBC response (Ray et al., 2014). Based on the absence of TRPM1 in  
97 *Lrit3<sup>nob6/nob6</sup>* mouse retina, it was concluded that TRPM1 depends upon expression of LRIT3 (Neuille et  
98 al., 2015). Taken together, these two observations raise the question of whether LRIT3 or nyctalopin is  
99 the key protein required for TRPM1 trafficking to the dendritic tips of DBCs. To address this, we  
100 assessed expression of key signalplex proteins in an independently generated *Lrit3<sup>-/-</sup>* mouse. Our  
101 results demonstrate that LRIT3 is required for nyctalopin expression and that mGluR6, TRPM1 and  
102 GPR179 are not required for LRIT3 expression. This absence of both nyctalopin and LRIT3 explains  
103 the no b-wave ERG phenotype in *Lrit3<sup>-/-</sup>* mice.  
104 Consistent with these data, we found that DBCs and ON RGCs in the ON signaling pathway of *Lrit3<sup>-/-</sup>*  
105 retinas, lacked normal visual responses. Surprisingly, we found significant changes in the visual  
106 responses in the OFF pathway. OFF RGCs had reduced light-evoked responses, although response  
107 latency was similar to wildtype. The origin of these abnormally small responses is a reduced OFF BC  
108 light response. The OFF BC postsynaptic kainate receptors respond normally to exogenous application  
109 of agonist, which places the cause of OFF pathway signaling defects upstream, potentially due to  
110 altered photoreceptor glutamate release or clearance. LRIT3 is the first protein described whose  
111 absence impacts both ON and OFF BC function without apparent gross defects in synaptic  
112 architecture. These data suggest that LRIT3 has at least two functions: assembly of the postsynaptic  
113 DBC signalplex and control of the glutamate concentration in the synaptic cleft.

114

## 115 **MATERIALS AND METHODS**

## 116 **Animals**

117 All procedures were performed in accordance with the Society for Neuroscience policies on the use of  
118 animals in research and the University of Louisville Institutional Animal Care and Use Committee.

119 Animals were housed in the University of Louisville AALAC approved facility under a 12 h/12 h  
120 light/dark cycle. The mouse line described in these studies, *Lrit3<sup>emrgg1</sup>*, is referred to as *Lrit3<sup>-/-</sup>*  
121 throughout (see results for details). The phenotypes of all the other lines have been previously  
122 published. *Trpm1<sup>-/-</sup>*, (*Trpm1<sup>tm1Lex</sup>*), (Shen et al., 2009); *Grm6<sup>-/-</sup>* (Masu et al., 1995); *Nyx<sup>nob</sup>* (Gregg et al.,  
123 2003); *GPR179<sup>nob5</sup>* (Peachey et al., 2012); *TgEYFP-Nyx* (Gregg et al., 2005); *MitoP-CFP* (Misgeld et  
124 al., 2007) and *TgVsx1-cerulean* (Hoon et al., 2015).

125 *Lrit3<sup>+/+</sup>* and *Lrit3<sup>+/-</sup>* litter mates of both sexes were used as controls throughout and the results from both  
126 were indistinguishable from C57Bl/6J. For all procedures, mice were anesthetized with a  
127 ketamine/xylazine solution (127/12 mg/kg, respectively) diluted in normal mouse Ringer's or euthanized  
128 using CO<sub>2</sub> according to AVMA guidelines.

129

## 130 **Generation of *Lrit3<sup>-/-</sup>* mice with Zinc Finger Nucleases (ZFN)**

131

132 C3H/HeNTac/C57BL/6NTac hybrid embryos (363) were injected with 10 ng/μl *Lrit3* ZFN mRNA and  
133 254 viable embryos were implanted into 9 Swiss Webster recipient mothers. Tail biopsies from offspring  
134 were collected and genomic DNA isolated using Direct Tail PCR solution (Thermo Scientific)  
135 supplemented with 0.2 μg/ml proteinase K (Thermo Scientific). Primers (5'-  
136 TAACCTGGGCATAGCCTGTC-3'; 5'- AAGGTCCAGGAAGGAGAAGG-3') were used to amplify the  
137 ZFN targeted region (chr3:129503565, mm9). PCR fragments were either sequenced directly or cloned  
138 into the TopoBlunt vector (Invitrogen) and at least 10 clones sequenced. The *Lrit3<sup>-/-</sup>* allele was  
139 backcrossed onto C57Bl/6J mice for 10 generations.

140

## 141 **Antibodies**

142 Sheep anti-LRIT3 and rabbit anti-TRPM1 antibodies were generated by immunizing animals with  
143 peptides (LRIT3: AVTPSRSPDFPPRRII; TRPM1: SVVPEGQNTQQEKRSAETE) conjugated to KLH,  
144 by Biosynthesis Inc. (Lewisville, TX). Table 1 provides the details of all antibodies used, their dilutions  
145 and sources. The specificity of the LRIT3 and TRPM1 antibodies were validated by comparing  
146 immunostaining in control and *Lrit3*<sup>-/-</sup> and *Trpm1*<sup>-/-</sup> mice, respectively.

147

### 148 **Retina preparation for immunohistochemistry**

149

150 Mice were killed by CO<sub>2</sub> inhalation followed by cervical dislocation. Eyes were enucleated and the  
151 cornea and lens removed. The retina was dissected in PBS (pH 7.4) and fixed for 15-30 mins in PBS  
152 containing 4% paraformaldehyde, then washed in PBS for 5 mins, and cryoprotected in a graded series  
153 of sucrose solutions (5, 10, 15 and 20% in PBS) and finally in OCT:20% sucrose (2:1). The retinas  
154 were then frozen by immersion in an isopentane bath immersed in liquid nitrogen. Transverse 18 μm  
155 sections were cut on a cryostat (Leica Biosystems, Buffalo Grove, IL) and mounted on Superfrost Plus  
156 slides (Thermo Fisher Scientific, Waltham, MA). Slides were stored at -80°C until used in  
157 immunohistochemistry experiments.

158 Immunohistochemistry methods have been described previously (Hasan et al., 2016). Briefly, slides  
159 were dried at 37°C for 30 mins, rinsed in PBS for 5 mins and then in PBX (PBS + 0.5% Triton X-100)  
160 for 5 mins. Sections were then incubated in blocking buffer (PBX + 5% normal donkey serum) for 1 h  
161 followed by overnight incubation with primary antibody in blocking buffer. Sections were washed 3 x 10  
162 mins in PBX, then incubated with secondary antibody diluted in blocking buffer for 1 h. Sections were  
163 washed 2 x 10 mins in PBX and 1 x 10 mins in PBS. Coverslips were mounted to slides using  
164 Vectashield (Vector Laboratories, Burlingame, CA). Sections were imaged on an FV-1000 Confocal  
165 Microscope (Olympus) with contrast and brightness adjusted using Fluoview Software (Olympus,  
166 Waltham, MA) or Photoshop (Adobe Systems, San Jose, CA).

167

## 168 **Electroretinography**

169 ERG methods have been described previously (Ray et al., 2014). Briefly, mice were dark adapted  
170 overnight and anesthetized with a ketamine/xylazine solution (127/12 mg/kg, respectively) diluted in  
171 normal mouse Ringer's and prepared for ERG recordings under dim red light. Pupils were dilated and  
172 accommodation relaxed with topical applications of 0.625% phenylephrine hydrochloride and 0.25%  
173 Tropicamide and the corneal surface anesthetized using 1% proparacaine HCl. Body temperature was  
174 maintained via an electric heating pad (TC1000 Temperature control, CWE Inc.). A clear acrylic contact  
175 lens with a gold electrode (LKC Technologies Inc.) was placed on the cornea and wet with artificial  
176 tears (Tears Again, OCuSOFT, Gaithersburg, MD). Ground and reference needle electrodes were  
177 placed in the tail and on the midline of the forehead, respectively. For scotopic responses, flashes (from  
178 -3.6 to 2.1 log cd s/m<sup>2</sup>) were presented to dark adapted animals. For photopic responses the animals  
179 were light adapted (20 cd/m<sup>2</sup>) for 5 mins and test flashes (from -0.8 to 1.9 log cd s/m<sup>2</sup>) were presented  
180 on this rod saturating background.

181

## 182 **Rod bipolar cell recordings**

183 Methods for the preparation of retinal slices and whole cell recordings from bipolar cells have been  
184 described previously (Ray et al., 2014). Briefly, isolated retinas were placed on nitrocellulose paper  
185 (MilliporeSigma, Burlington MA). ~200 μm transverse slices prepared using a tissue slicer and placed in  
186 the recording chamber using vacuum grease. The recording chamber was constantly superfused with  
187 oxygenated Ringer's and all solutions were maintained at 34-35°C. Recording electrodes with  
188 resistance measured between 6-9 MΩ were filled with Cs-gluconate intracellular solution (in mM: 20  
189 CsCl, 107 CsOH, 107 D-Gluconic Acid, 10 NaHEPES, 10 BAPTA, 4 ATP, 1 GTP). 1% sulforhodamine  
190 was included in the intracellular solution to visualize and classify the cell based on its morphology  
191 (Ghosh et al., 2004). Inhibitory blockers (1 μM strychnine, 100 μM picrotoxin and 50 μM 6-  
192 tetrahydropyridin-4-yl methylphosphinic acid (TPMPA)) were included in bath solutions as was L-AP4 (4  
193 μM) to saturate mGluR6 receptors. OFF cone BC somas were targeted for whole cell voltage clamp



194 recording in *Vsx1*-cerulean reporter mice where Type 1 and 2 HBCs (BC1 and BC2) are sparsely  
195 labeled (Hoon et al., 2015). Only BC1s with an input resistance  $\sim 1$  G $\Omega$  and access resistance  $< 25$  M $\Omega$   
196 were used for recording and were voltage clamped at +50 mV (Nawy, 2004; Shen et al., 2009). A  
197 Picospritzer II (Parker Instrumentation, Cleveland, OH) was used to pressure apply drugs onto BC  
198 dendritic tips located in the outer plexiform layer (OPL). Pressure applied drugs were the mGluR6  
199 receptor antagonist  $\alpha$ -cyclopropyl-4-phosphonophenylglycine (CPPG, 0.6 mM) to activate DBCs or  
200 kainate (50 $\mu$ m) to activate kainate receptors on HBCs. All reagents were purchased from Sigma-  
201 Aldrich, except L-AP4 and kainate, which were purchased from Tocris Bioscience (Avonmouth, Bristol,  
202 BS11 9QD United Kingdom). Clampfit 10.2 was used for off-line analyses of data. Currents were  
203 filtered off-line using a 20 Hz eight-pole Bessel low-pass filter.

204

## 205 **Glutamate imaging**

206

207 To broadly target iGluSnFR expression to retinal ganglion cells and amacrine cells  
208 AAV2/1.*hSynapsin*.iGluSnFR in suspension was injected into the mouse eye, intravitreally (0.8 –1.0  $\mu$ l  
209 volume H<sub>2</sub>O (0.8 - 3.0  $\times 10^{13}$  IU/ $\mu$ l). Animals were killed 14-21 d after AAV injection and the retinas  
210 prepared as described previously (Borghuis et al., 2011). Isolated retinas were mounted photoreceptor-  
211 side down on a nitrocellulose filter paper disc (Millipore Sigma, Burlington, MA) with 1.0-mm-diameter  
212 holes for visual stimulation through the condenser, and placed in a perfusion chamber on a custom-built  
213 two-photon fluorescence microscope. Tissue was continuously perfused with oxygenated Ames  
214 medium at physiological temperature ( $\sim 6$  ml/min; 34–36°C). Changes in iGluSnFR fluorescence, which  
215 represent the binding of glutamate to iGluSnFR, were measured as described previously (Borghuis et  
216 al., 2013), using a 60x, 1.0 NA, LUMPlanFI/IR objective (Olympus, Waltham, MA) and an ultrafast  
217 pulsed laser (Chameleon Ultra II; Coherent, Santa Clara, CA) tuned to 915 nm. The visual stimulus  
218 comprised a contrast reversing spot (150  $\mu$ m diameter for BCs, 300  $\mu$ m for GCs; 100% Michelson  
219 contrast; 1 Hz temporal modulation; 5 s duration) on a photopic background ( $\lambda_{\max} = 395$  nm;  $5.8 \times 10^4$

220 photons/ $\mu\text{m}^2/\text{s}$ ). Images (512 x 128 pixels) were acquired at 16 frames/sec; line scans were collected at  
221 2 kHz and presented down-sampled to 0.5 kHz. Fluorescence responses were quantified using custom  
222 algorithms in Matlab (Mathworks, Natick, MA).

223

### 224 **RGC and OFF BC whole-cell recordings from retinal whole-mounts.**

225

226 Genetically identified BC1 cells were recorded in the whole mount retina of MitoP-CFP transgenic mice  
227 on a *Lrit3*<sup>-/-</sup> or control background. Alpha-type ON and alpha and delta-type OFF ganglion cells were  
228 targeted for recording based on soma size; cell type was verified post-hoc using two-photon  
229 fluorescence imaging of dye fills (Sulphorhodamine 101) and signature features of the recorded current  
230 responses. Visually-evoked excitatory and inhibitory currents were recorded in whole-cell configuration  
231 at the reversal potential for chloride (-69 mV) and cations (0 mV), respectively, using conventional  
232 methods (Multiclamp 700B, Digidata 1550, PClamp10; MDS Analytical Technologies, Union City, CA)  
233 and cesium-based internal pipette solution (in mM: 90 cesium methanesulfonate, 5 TEA-Cl, 10 HEPES,  
234 10 BAPTA, 3 NaCl, 2 QX-314, 4 ATP-magnesium salt, 0.4 GTP-sodium salt, 10 Tris-phosphocreatine;  
235 pH 7.3, ~284 mOsm). OFF BC membrane voltage responses were recorded in current clamp, using  
236 potassium-based internal solution (in mM: 110 potassium methane sulfonate, 10 HEPES, 0.1 EGTA, 5  
237 NaCl, 4 ATP-magnesium salt, 0.4 GTP-sodium salt, 10 Tris-phosphocreatine; pH 7.3, ~284 mOsm).  
238 Data was analyzed using custom algorithms in Matlab.

239

### 240 **Multi-electrode array recordings of RGCs**

241

242 Methods of the recording procedures for the multi-electrode array (MEA) have been published  
243 (Peachey et al., 2017a). Mice were dark-adapted overnight, deeply anesthetized with  
244 ketamine/xylazine, and killed by cervical dislocation under dim red light. The retinas were dissected  
245 under dim red light in oxygenated Ringer's solution. The vitreous was removed by incubation (10 min)

246 in Ringer's solution containing collagenase (12U/ $\mu$ l) and hyaluronidase (50U/ $\mu$ l) (Worthington  
247 Biochemicals, Lakewood, NJ). Pieces in dorsal and ventral retina were dissected (2 mm x 2 mm) and  
248 placed ganglion cell side down on a sixty electrode MEA (60MEA200/30Ti; Multi Channel Systems,  
249 Reutlingen, Germany). Retinal pieces were covered with a transparent cell culture membrane  
250 (ThermoFisher Scientific, Waltham, MA) and held in place with a platinum ring. The recording chamber  
251 was continuously perfused with oxygenated Ringer's solution at 36°C throughout the experiment. Prior  
252 to recording, the preparation was allowed to settle for ~1hr in darkness. Spontaneous activity under  
253 dark adapted conditions was recorded for 10 mins followed by 10 or 20 trials of full-field light stimulation  
254 (5s/2s or 20s/10s interstimulus/stimulus interval, respectively). Light adapted responses were recorded  
255 after 5 min of adaptation to a background of 3.01 cd/m<sup>2</sup>. Three intensity levels were used and  
256 presented in order of increasing luminance (scotopic levels: 0.004, 0.03, 1.49 cd/m<sup>2</sup> and photopic  
257 levels: 2.71, 14.7, 303 cd/m<sup>2</sup>). Signals were band-pass filtered (80–3,000 Hz) and digitized at 25 kHz  
258 (MC Rack software; Multi Channel Systems, BW Germany). Spikes were recorded on individual  
259 electrodes. When electrodes recorded spikes from more than one RGC we sorted spikes using a  
260 principal components analysis (Offline Sorter; Plexon, Dallas, TX). Sorted units were exported, spikes  
261 binned (50 ms) and their spontaneous and visually evoked responses were analyzed (NeuroExplorer;  
262 Nex Technologies, Madison, AL). Spontaneous activity was examined for the presence of rhythmic  
263 activity using a power spectral density FFT analyses (NeuroExplorer) with 4096 frequency values and a  
264 Hann window function. The mean FFT was smoothed using a Gaussian filter with a bin width of 30 ms.  
265 The frequency of the FFT peak was plotted as a function of power in arbitrary units (A.U.). Using  
266 custom scripts, we defined light evoked responses as a response with a peak firing rate that was > +10  
267 SEM above mean spontaneous. The time to peak of the evoked response was defined as the time after  
268 stimulus onset when the peak firing rate reached its maximum. Raster plots show responses to each  
269 stimulus presentations and peri-stimulus time histograms (PSTHs) represent the average spiking rate  
270 across all stimulus presentations.

271

272 **Statistical analyses**

273  
274 Prism 7.03 software (Graphpad Software, Inc., La Jolla, CA) was used to perform the statistical  
275 analyses as suited for the necessary comparison: two-way repeated measures ANOVAs, two-way  
276 ANOVAs, one-way ANOVAs, or t-tests. Tukey post-hoc tests were used when appropriate. Statistical  
277 significance =  $P < 0.05$ . When comparing Peak firing rate and time to peak data, Kruskal Wallis tests  
278 were used.

279

280 **RESULTS**

281

282 We used zinc finger nucleases to generate a *Lrit3*<sup>-/-</sup> mouse. Several lines were created and we used  
283 one with a 40 base pair deletion within exon 2 (Fig. 1A;(Ray, 2013) del chr3:129800675-129800714  
284 GRCm38/mm10), which causes a frameshift. We assessed retinal function in the *Lrit3*<sup>-/-</sup> mice with the  
285 electroretinogram (ERGs) and found that the a-wave was normal, but the b-wave was absent under  
286 both scotopic (Fig. 1B) and photopic (Fig. 1C) conditions. This no b-wave phenotype is similar to *Grm6*  
287 <sup>-/-</sup> (Peachey et al., 2017), *Nyx*<sup>nob</sup> (Pardue et al., 1998), *Trpm1*<sup>-/-</sup> (Shen et al., 2009) and *GPR179*<sup>nob5/nob5</sup>  
288 (Peachey et al., 2012) mice. These results indicate that LRIT3 is critical to DBC function, similar to the  
289 results described for a different LRIT3 mutant mouse, *Lrit3*<sup>nob6/nob6</sup> (Neuille et al., 2014) and in humans,  
290 where mutations in LRIT3 cause complete congenital stationary night blindness (cCSNB)(Zeit et al.,  
291 2013).

292 To determine where the LRIT3 protein is expressed we generated an antibody to LRIT3 and verified its  
293 specificity in *Lrit3*<sup>-/-</sup> retina using immunohistochemistry and western blotting (Fig. 1D-F). The LRIT3  
294 antibody showed strong punctate staining exclusively in the OPL in the control retina and an absence of  
295 staining in the *Lrit3*<sup>-/-</sup> retina (Fig. 1E). Western blot analyses further supported the absence of LRIT3 in  
296 retinal lysates from *Lrit3*<sup>-/-</sup> retinas (Fig. 1F). These data show that the antibody is specific to LRIT3 and  
297 that expression of LRIT3 is restricted to the OPL.

298

## 299 **LRIT3 is required for expression of nyctalopin**

300

301 Our previous work showed that the expression and correct localization of TRPM1 depends on the  
302 expression of nyctalopin (Pearing et al., 2011). The observation that TRPM1 is not expressed in *Lrit3*<sup>-/-</sup>  
303 retina (Neuille et al., 2015) raised the question whether TRPM1 depends on LRIT3 directly or if its  
304 expression is lost due to a concomitant loss of nyctalopin. To address this, we examined the expression  
305 pattern of nyctalopin in *Lrit3*<sup>-/-</sup> and control retinas (Fig 2A), by crossing a transgenic mouse line  
306 (*TgEYFP-Nyc*) that expresses an EYFP-nyctalopin fusion protein (Gregg et al., 2005) onto the *Lrit3*<sup>-/-</sup>  
307 genetic background. In control *TgEYFP-Nyc* retina immunohistochemical analyses for EYFP-nyctalopin  
308 resulted in a punctate staining pattern in the OPL, localized to the tips of rod and cone DBCs, where it  
309 co-localized with both LRIT3 and the synaptic marker pikachurin (Fig 2Ai). *Lrit3*<sup>-/-</sup>/*TgEYFP-Nyc* retina  
310 showed no EYFP-nyctalopin expression (Fig. 2Aii), even though these mice carried a copy of the  
311 EYFP-nyctalopin transgene. Thus, we conclude that nyctalopin expression on the DBC dendritic tips  
312 depends on LRIT3 expression.

313 We tested whether LRIT3 expression depends on nyctalopin by examining its expression in *Nyx*<sup>nob</sup>  
314 mutant mice. In *Nyx*<sup>nob</sup> retina (Fig. 2B), both LRIT3 and pikachurin are expressed and co-localize on the  
315 rod and cone DBC tips, similar to control mice (Fig 1Ai). We also verified the absence of TRPM1  
316 expression in our independent line of *Lrit3*<sup>-/-</sup> mice (Fig 2C).

317 Based on these observations we conclude that nyctalopin expression depends on LRIT3 expression,  
318 and that the loss of TRPM1 from the dendritic tips of all *Lrit3*<sup>-/-</sup> DBCs (Fig. 1E) results from the loss of  
319 nyctalopin expression.

320

## 321 **LRIT3 localization is independent of expression of other DBC cascade components.**

322

323 The absence of mGluR6, GPR179 or TRPM1 has varying effects on the localization and expression of

324 other cascade components (see (Gregg et al., 2014) for review). We determined whether these DBC  
325 signalplex components are required for normal expression of LRIT3, using *Grm6*<sup>-/-</sup>, *Gpr179*<sup>-/-</sup> and  
326 *Trpm1*<sup>-/-</sup> mouse retinas. Sections from each line were reacted with antibodies to pikachurin and LRIT3,  
327 and the staining patterns compared to control and *Lrit3*<sup>-/-</sup> retinas (Fig. 3). Both LRIT3 and pikachurin are  
328 localized normally to the dendritic tips of both rod and cone DBCs in *Grm6*<sup>-/-</sup>, *Gpr179*<sup>-/-</sup> and *Trpm1*<sup>-/-</sup>  
329 mouse retina. These data demonstrate that the trafficking and localization of LRIT3 is independent of  
330 mGluR6, GPR179 and TRPM1.

331 The *Lrit3*<sup>nob6</sup> mutant is reported to lack expression of TRPM1 in rod BC dendrites and TRPM1, mGluR6,  
332 GPR179, RGS7 and 11, Gβ5 and GαO in cone BC terminals (Neuille et al., 2015). We found similar  
333 results in our *Lrit3*<sup>-/-</sup> line and extend the previous report with R9AP, which also is missing at the cone,  
334 but not rod BC terminals (Fig. 2 and Extended Fig. 2.1).

335

### 336 **RGC signaling in the *Lrit3*<sup>-/-</sup> retina is abnormal**

337

338 We used the same assays of RGC function that defined abnormal response properties of RGCs in  
339 other (no b-wave) mouse models of cCSNB, *Nyx*<sup>nob</sup>, and *Grm6*<sup>-/-</sup> (Demas et al., 2006) (Peachey et al.,  
340 2017a). These abnormalities include the absence of normal latency ON responses (light onset) and  
341 rhythmic bursting in almost all RGCs. However, OFF responses had normal latency.

342 We surveyed the response properties of >1000 RGCs in *Lrit3*<sup>-/-</sup> and control retinas using a multi-  
343 electrode array (MEA). To optimize stimulus conditions we evaluated responses in a subset of RGCs  
344 over 3 intensity flashes in the dark-adapted and light adapted retina. In control retinas, the brightest  
345 stimulus intensity (303 cd/m<sup>2</sup>) evoked responses in ~100% of RGCs (Fig. 4A). Conversely, only 39% of  
346 *Lrit3*<sup>-/-</sup> RGCs produced a light response, even at the brightest stimulus intensity. For the remaining  
347 experiments we present data generated using the brightest photopic flash stimulus. We divided RGCs  
348 into (1) non-responsive RGCs, which showed spontaneous activity but no visually evoked response,  
349 and among visually responsive RGCs, (2) those with a response to light onset (ON or delayed ON

350 (dON)), (3) those with a response to light offset (OFF ) or (4) those with a response to light onset and  
351 offset (ON/OFF). We compared the distribution of these four type in control, *Lrit3*<sup>-/-</sup>, and *Grm6*<sup>-/-</sup> retinas  
352 (summarized in Fig. 4B; representative visually evoked responses for each genotype shown in Fig. 4C).  
353 All control RGCs had excitatory light-evoked spiking responses significantly above their spontaneous  
354 activity. Of these control RGCs, 47% had an excitatory response at light onset (ON RGCs), 27% had an  
355 excitatory response at light offset (OFF RGCs), and 20% had an excitatory response to both luminance  
356 changes (ON/OFF RGCs).

357 Against this baseline we compared RGC responses in *Lrit3*<sup>-/-</sup> mice, and also in *Grm6*<sup>-/-</sup> mice because  
358 they share the no b-wave phenotype. The percentages of RGC response types in the two mutants were  
359 strikingly different and each also differed from control (Fig 4B). As expected from a no b-wave  
360 phenotype, neither *Lrit3*<sup>-/-</sup> nor *Grm6*<sup>-/-</sup> retinas had ON responses with short latency, although each had  
361 RGCs whose ON responses were significantly delayed compared to control (> 0.5 sec, time to peak),  
362 9% in *Lrit3*<sup>-/-</sup> retinas compared to 31% in the *Grm6*<sup>-/-</sup> retinas. We also found a large and unexpected  
363 difference in the percentage of visually non-responsive RGCs in the *Lrit3*<sup>-/-</sup> versus *Grm6*<sup>-/-</sup> retinas (50%  
364 vs. 10%, Fishers p<0.0001). These differences in the proportions of non-responsive RGCs as well as  
365 across visually responsive classes prompted us to examine additional aspects of their responses.  
366 The large number of NR cells in the *Lrit3*<sup>-/-</sup> suggests that their sensitivity may be impacted, so we  
367 examined the peak response of RGCs and found that *Lrit3*<sup>-/-</sup> OFF RGC peak responses were  
368 significantly smaller than control (median = 24.7sp/sec, n=242 vs. 37.6 sp/sec, n=86) although *Lrit3*<sup>-/-</sup>  
369 OFF responses were larger than *Grm6*<sup>-/-</sup> RGCs (18.5 sp/sec, n=241; Fig 4D; Kruskal-Wallis; both  
370 comparisons p < 0.0001). In contrast, the time to peak response of OFF RGCs was similar across  
371 genotype (Fig. 4E; Kruskal-Wallis; p = 0.995). In the few *Lrit3*<sup>-/-</sup> ON/OFF RGCs the time to peak firing at  
372 light onset (median = 660 msec, n=8) was significantly delayed compared to control (median = 250 ms,  
373 n=263; p=?) and similar to *Grm6*<sup>-/-</sup> RGCs (median = 550 ms, n=35; p=?) we reported previously  
374 (Peachey et al., 2017b).

375 To verify that the OFF RGCs responses in *Lrit3*<sup>-/-</sup> were initiated in the OFF pathway we compared light  
376 evoked responses in control solution to those in the presence of the kainate receptor antagonist ACET  
377 (1  $\mu$ M), and after 1 hour wash (Fig 4F). Of the 515 *Lrit3*<sup>-/-</sup> RGCs, 180 (35%) had visually evoked OFF  
378 responses in control solution. After addition of ACET to the bath, only 11 (6%) retained a visual  
379 response, and all showed a reduced peak amplitude (~43% of control). After washout, 37 RGCs  
380 recovered their OFF response. These data demonstrate that light-evoked OFF responses originated in  
381 the OFF signaling pathway.

382 We previously reported that *Nyx*<sup>nob</sup> RGCs show rhythmic bursting in their spontaneous activity, which  
383 also is superimposed on their light evoked responses (Demas et al., 2006). Both the post stimulus time  
384 histograms, as well as the raster plots (Fig 4Cii) show that rhythmic activity is present in *Lrit3*<sup>-/-</sup> RGCs.  
385 *Lrit3*<sup>-/-</sup> RGCs showed rhythmic activity regardless of whether a visual response was present or absent.  
386 Similar to *Nyx*<sup>nob</sup> RGCs, *Lrit3*<sup>-/-</sup> RGCs showed rhythmic activity with a fundamental frequency between 3  
387 and 8 Hz (Fig 4G). In contrast, the majority of *Grm6*<sup>-/-</sup> RGCs did not have rhythmic activity and in the  
388 few that did (Fig. 4G, 24/866), the fundamental frequency of the response modulation ranged between  
389 5.6 and 9 Hz and the modulation amplitude was lower by ~3-fold compared with *Lrit3*<sup>-/-</sup> RGCs (11.4 vs  
390 34.8 A.U).

391

### 392 **ON and OFF BC signaling in the *Lrit3*<sup>-/-</sup> retina is abnormal**

393

394 The large number of non-responsive *Lrit3*<sup>-/-</sup> RGCs and OFF RGCs with reduced peak firing rates led us  
395 to examine light-evoked glutamate release in the IPL at the level of the bipolar cell axon terminals. We  
396 expressed the fluorescent glutamate sensor iGluSnFR in RGCs and amacrine cells using viral  
397 transduction and recorded iGluSnFR fluorescence during visual stimulation, using two-photon imaging  
398 (Borghuis et al., 2013). Control retinas showed robust fluorescence responses in the ON and OFF  
399 sublaminae of the IPL, reflecting glutamate release from ON and OFF BCs, respectively (Fig 5A, B). In  
400 *Lrit3*<sup>-/-</sup> retina glutamate release was negligible in the ON sublaminae (*Lrit3*<sup>-/-</sup> -0.002  $\pm$  0.009, n = 8 vs.



401 control  $0.306 \pm 0.028$ ,  $n = 9$ ; t-test,  $p < 0.0001$ ), as expected from the ERG no-b wave phenotype.  
402 Although we observed clear stimulus modulated glutamate release in the OFF sublaminae at light  
403 decrements, the amplitude of the response ( $\Delta F/F$ ) was reduced compared with control (*Lrit3*<sup>-/-</sup>,  $0.173 \pm$   
404  $0.037$ ,  $n = 11$  vs. control  $0.420 \pm 0.065$ ,  $n = 5$ ; t-test,  $p = 0.0027$ ; Fig. 5B, C).  
405 To understand the changes underlying the reduced signaling in ON and OFF pathways at the level of  
406 the inner retina, we examined three well characterized RGCs—ON alpha, OFF alpha and OFF delta—  
407 using whole-cell voltage clamp recordings in control and *Lrit3*<sup>-/-</sup> retinal whole mount preparations (Fig.  
408 5D). RGC identity was confirmed based on morphology defined by a red fluorescent dye that diffused  
409 from the intracellular pipette solution. Clamped at the reversal potential for chloride ( $E_{Cl}$ ,  $-69$  mV),  
410 control ON alpha RGCs showed a robust inward (excitatory) current at light onset and suppression of  
411 the tonic inward current at light offset, reflecting the stimulus-evoked modulation in glutamate release  
412 from presynaptic ON BCs. In *Lrit3*<sup>-/-</sup> ON alpha cells, both the inward ON response and the suppression  
413 of the tonic inward current were absent (inward current *Lrit3*<sup>-/-</sup>  $23.5 \pm 12.3$  pA,  $n = 14$  vs. control  $-317.1$   
414  $\pm 37.6$  pA,  $n = 6$ ; t-test,  $p < 0.0001$ ; Fig. 5E). Instead, the suppression of glutamate release following light  
415 offset was replaced by a small transient inward current, which is likely due to All amacrine-cell  
416 mediated signaling from OFF BCs to ON BCs, but was not investigated further. OFF alpha and OFF  
417 delta RGCs in control retinas each showed their characteristic inward currents at light offset (Borghuis  
418 et al., 2014). While the response polarity and timing in *Lrit3*<sup>-/-</sup> OFF alpha and delta cells were similar to  
419 control, the response amplitudes of both cell types was significantly decreased (OFF alpha: *Lrit3*<sup>-/-</sup> -  
420  $221.4 \pm 29.6$  pA,  $n = 7$  vs. control  $-546.6 \pm 78.8$  pA,  $n = 6$ ; t-test,  $p = 0.0017$ ; OFF delta  $-139.7 \pm 9.2$  pA,  
421  $n = 3$  vs.  $-181.8 \pm 10.4$  pA,  $n = 3$ ; Fig. 5E). The observation that excitatory input to the transient OFF  
422 cell decreases 60%, whereas the decrease in the sustained OFF cell is just 23% may indicate that loss  
423 of LRIT3 differentially affects the specific BC types presynaptic to each RGC type.  
424 These data show that *Lrit3*<sup>-/-</sup> ON alpha RGCs lack excitatory synaptic input at light onset, as expected,  
425 but also that the amplitudes of light-evoked excitatory current in at least two identified OFF RGC types  
426 are reduced. Collectively, the MEA and voltage clamp data suggest that all RGCs in *Lrit3*<sup>-/-</sup> retinas are

427 less responsive than controls, although the magnitude of the impact varies with RGC type. Given that  
428 LRIT3 is not expressed in the IPL (Fig. 1D), the most likely explanation for the defects in OFF RGCs is  
429 that their OFF BC input is decreased.

430

### 431 ***Lrit3*<sup>-/-</sup> retinas show abnormal ON and OFF BC function**

432 We used patch clamp recordings of rod BCs and measured TRPM1 mediated currents. We simulated  
433 dark by bathing the slices in L-APB to activate mGluR6 and close TRPM1, then inactivated the mGluR6  
434 to TRPM1 cascade by puffing on CPPG, which opens TRPM1 (Shen et al., 2009). In control cells  
435 CPPG mediates a robust current that is absent in both *Lrit3*<sup>-/-</sup> and *Trpm1*<sup>-/-</sup> rod BCs (Fig. 6A). The small  
436 residual current in both knockouts has been observed previously and arises from an unknown source  
437 (Ray et al., 2014). The decreased amplitude of the OFF RGCs in the MEA and patch clamp recordings  
438 of *Lrit3*<sup>-/-</sup> RGCs, and the decrease in glutamate release in their OFF sublaminae could result from  
439 disruption of the AMPA/kainate receptors at the cone:cone DBC synapse. Thus, we recorded  
440 responses to kainate puffs in Type 1 OFF BCs (BC1s) in retinal slices from *Tg-Vsx/Lrit3*<sup>-/-</sup> retinas (Fig.  
441 6B). Kainate elicited a robust inward current in control BC1s. On average the control response was  
442 similar to the kainate response in *Lrit3*<sup>-/-</sup> BC1s. Our interpretation is that the absence of LRIT3 does not  
443 impact either the number or function of kainate receptors on BC1s. In addition, we examined light-  
444 evoked currents in identified BC1s using two-photon fluorescence imaging in a whole mount retina  
445 preparations. Whole-cell recordings in response to light stimuli at a range of holding potentials, showed  
446 robust light-evoked excitatory and inhibitory currents (Fig 6C). Responses were characterized by an  
447 excitatory current following light decrements recorded at  $E_{Cl}$  (~-60 mV) and an inhibitory current at  
448  $E_{cation}$  (~0 mV) following both light decrements and increments, indicating that BC1s receive a  
449 combination of feed-forward (OFF pathway-mediated) and cross-over inhibition (ON pathway-mediated  
450 through the All amacrine cell). In *Lrit3*<sup>-/-</sup> BC1s, the excitatory currents were decreased dramatically and  
451 the transient part of the response was absent (Fig. 6D,E). Since the iGluR density appears normal (Fig.  
452 5B), this results suggests that either glutamate release is decreased or its concentration changed in the

453 cleft. Finally, *Lrit3*<sup>-/-</sup> BC1 inhibitory currents were less synchronized to the stimulus, consistent with loss  
454 of function in the ON signaling pathway responsible for cross-over inhibition.

455  
456 Membrane voltage responses recorded in control BC1s in current clamp mode showed a ~20mV  
457 membrane depolarization at light offset, which was only 1-2mV in *Lrit3*<sup>-/-</sup> BC1s. This demonstrates that  
458 the absence of LRIT3 causes near-complete loss of function in this bipolar cell type. Because BC1s are  
459 the predominant source of excitatory input to OFF delta GCs, this result explains their loss of excitation  
460 (Fig. 5). Since the OFF alpha cells sample from a different complement of BC types (primarily BC3a,  
461 BC3b, and BC4) their decreased excitatory input (Fig. 5B, C) suggests that loss of function  
462 demonstrated in BC1 generalizes to other OFF BC types, including those that drive OFF alpha GCs.  
463 The decreased response of all OFF BCs is consistent with the decrease in glutamate release in the  
464 OFF sublaminae (Fig 5B). We propose that LRIT3 is critical for normal glutamate concentration  
465 dynamics within the cone→cone BC synaptic cleft.

466

## 467 **DISCUSSION**

468

469 We show that LRIT3 is required not only for ON but also, surprisingly, for OFF BC function,  
470 independent of crossover input from the ON pathway. The latter defect leads to abnormal OFF RGC  
471 responses that have not been observed in any other CSNB1 mouse model examined to date. Mutations  
472 in *LRIT3* were first identified after exome sequencing of DNA samples from individuals with CSNB1  
473 (Zeitze et al., 2013). Our ERG studies, and those of others (Fig. 1, (Ray, 2013; Neuille et al., 2014))  
474 show the typical no b-wave phenotype reported in numerous other CSNB1 mouse models (Masu et al.,  
475 1995; Pardue et al., 1998; Morgans et al., 2009; Shen et al., 2009; Koike et al., 2010; Peachey et al.,  
476 2012).

477 LRIT3 colocalizes with DBC signalplex proteins: TRPM1, mGluR6, GPR179, nyctalopin, RGS7,  
478 RGS11, Gβ5 and R9AP. Analyses of *Lrit3*<sup>-/-</sup> and *Lrit3*<sup>nob6/nob6</sup> mice show that LRIT3 is required for

479 localization of TRPM1 to the rod DBC signalplex. On cone DBCs LRIT3 also is required for TRPM1  
480 localization, but also all the other signalplex proteins (Fig. 2 and 2.1, (Ray, 2013) (Neuille et al., 2015).  
481 Based on this result, Neuille and colleagues (Neuille et al., 2015) argued that LRIT3 was required for  
482 TRPM1 localization. Our data show that this is true, but that the hierarchy must include nyctalopin  
483 expression, which is directly required for TRPM1 trafficking/localization (Pearing et al., 2011). In this  
484 scenario, the loss of TRPM1 is secondary to the loss of nyctalopin in the *Lrit3*<sup>-/-</sup> retina.  
485 Further, PNA staining, which marks cone terminals in the OPL, also is absent or greatly reduced in  
486 expression. These data indicate LRIT3 has additional functions at the cone to cone DBC synapse,  
487 compared to rod to rod bipolar cells. Since PNA is thought to be a presynaptic marker, LRIT3 is the first  
488 protein whose absence not only causes DBC dysfunction but also alters expression of a presynaptic  
489 protein, without structural disruption of the synapses.  
490 This disruption in PNA expression, led us to examine dysfunction in OFF BC and RGC function in *Lrit3*<sup>-/-</sup>  
491 mice. RGC response properties have been examined in several CSNB1 mouse lines (*Nyx*<sup>nob</sup> (Demas  
492 et al., 2006), *Grm6*<sup>-/-</sup> (Renteria et al., 2006; Pinto et al., 2007; Peachey et al., 2017a), *Trpm1*<sup>-/-</sup> (Takeuchi  
493 et al., 2018) and *Lrit3*<sup>-/-</sup> (Fig. 4) and *Lrit3*<sup>nob6</sup> (Neuille et al., 2017). Consistent with the absence of an  
494 ERG b-wave these mutant RGCs lack normal ON responses (MEA and patch clamp recordings). The  
495 only responses to light onset are significantly delayed and have been shown to arise from the OFF  
496 BCs, via crossover pathways (Renteria et al., 2006). In the *Lrit3*<sup>-/-</sup> retinas we find that the response  
497 amplitude of the OFF RGCs is decreased compared to controls and that over half the RGCs fail to  
498 respond to light stimuli. These results differ from a previous report using the *Lrit3*<sup>nob6/nob6</sup> mouse line  
499 (Neuille et al., 2017).

500  
501 The absence of ON BC crossover input to RGCs results in decreased response amplitudes in both  
502 *Lrit3*<sup>-/-</sup> and *Grm6*<sup>-/-</sup> retinas (Fig. 4), and similar effects can be mimicked by addition of L-AP4 to control  
503 retinas. However, a unique feature of *Lrit3*<sup>-/-</sup> RGCs is that there are 5 times as many visually non-  
504 responsive RGCs compared to *Grm6*<sup>-/-</sup> retinas (50% vs 10%). This suggests that the underlying

505 mechanisms responsible for the decreased responses differ. The recordings of excitatory currents in  
506 two types of OFF RGCs, OFF-alpha and OFF delta, support this idea; both show significant decreases  
507 in light responses in the *Lrit3*<sup>-/-</sup> compared to control. Of particular note is that the decrease in *Lrit3*<sup>-/-</sup>  
508 OFF-alpha cells (~90%) is far greater than the decrease produced when WT OFF-alpha cells are  
509 recorded in the presence of L-AP4 (~25% decrease in excitatory current (Borghuis et al., 2014)).  
510 Further, when OFF delta cells are recorded in the presence of L-AP4 their excitatory currents actually  
511 increase (Borghuis et al., 2014). From these data we postulated that the effects on the *Lrit3*<sup>-/-</sup> OFF  
512 RGCs results from a direct decrease in excitatory input from OFF BCs to OFF RGCs. This is fully  
513 supported by our recordings from one type of OFF BC, BC1's, in which the light responses are  
514 significantly decreased in the *Lrit3*<sup>-/-</sup> compared to control retinas.

515  
516 The mechanism underlying the decreased excitatory input to OFF BCs requires further study. That  
517 said, it is clear that it does not arise from defects in photoreceptor transduction because the *Lrit3*<sup>-/-</sup>  
518 scotopic and photopic a-waves are the same as controls (Fig. 1). Because the expression of LRIT3 is  
519 restricted to the OPL, we propose two possible changes that result in reduced excitatory responses in  
520 OFF BCs. First, LRIT3 could modulate photoreceptor glutamate release, although at the rod synapse  
521 this requires a mechanism independent of the calcium channel Cav1.4. Neuille et. al (2017) reported  
522 that the number of invaginating cone DBCs was decreased without effecting the number of flat  
523 synapses with OFF BCs in the *Lrit3*<sup>hob6/nob6</sup> retina. Therefore, it is possible a disruption in the synaptic  
524 architecture could negatively impact glutamate release. The other possibility is that LRIT3 is involved in  
525 proteins that function in glutamate reuptake. Disrupting glutamate reuptake could elevate its  
526 concentration in the synapse and cause smaller changes in glutamate concentration in responses to  
527 stimuli. In this regard the more depolarized resting membrane potential of the BC1s (that we report) in  
528 the *Lrit3*<sup>-/-</sup> retinas supports this conclusion.

529 In conclusion, our studies show that LRIT3 not only controls the post-synaptic assembly of the signaling  
530 complexes in DBCs, but also disrupts glutamate release or handling in the cone synaptic cleft resulting  
531 in decreases in excitatory responses in OFF BCs, and thus OFF RGCs.

532

## 533 FIGURE LEGENDS

534

535 Figure 1. LRIT3 is required for normal ERGs and is expressed in the OPL. **A**, Schematic of the *Lrit3*  
536 gene indicating the target region (\*) for the zinc finger nuclease and resulting 40 bp deletion in the *Lrit3*  
537 <sup>-/-</sup> mouse line. **B**, Electroretinograms of control (black symbols) and *Lrit3*<sup>-/-</sup> (red symbols) mice under  
538 scotopic and **C**, photopic conditions. Example responses waveforms for 5 (scotopic) or 3 (photopic)  
539 luminance steps are shown, as well as summary data for all luminance steps. The *Lrit3*<sup>-/-</sup> mice have a  
540 normal a-wave, but lack the b-wave under both scotopic and photopic conditions. **D**, DIC (left) and  
541 immunohistochemical staining for LRIT3 in transverse sections from the control mouse retina. **E**,  
542 Staining of OPL of control and *Lrit3*<sup>-/-</sup> retinas for LRIT3. **F**, Western blot for LRIT3 and a loading control  
543  $\beta$ -actin in control and *Lrit3*<sup>-/-</sup> retinas. These data show the LRIT3 antibody is specific. OS, outer  
544 segments, OPL, outer plexiform layer, INL, inner nuclear layer, IPL, inner plexiform layer, GC, ganglion  
545 cell layer.

546

547 Figure 2. Nyctalopin expression requires LRIT3 expression. **A**, EYFP-Nyctalopin (red), LRIT3 (green)  
548 and pikachurin (magenta) staining in **Ai**, control and **Aii**, *Lrit3*<sup>-/-</sup> retinas, carrying the TgNyc-EYFP  
549 transgene. Note that Nyctalopin-EYFP is not expressed in the *Lrit3*<sup>-/-</sup> retina. **B**, Although *Nyx*<sup>nob</sup> retinas  
550 lack nyctalopin, LRIT3 is expressed and localized to the dendrites of the rod and cone (marked by  
551 arrowheads) DBCs. **C**, As expected, TRPM1 (green) is mislocalized in *Lrit3*<sup>-/-</sup> retinas and pikachurin  
552 expression is normal. These are representative images of data from at least 4 mice. OPL, outer  
553 plexiform layer; INL, inner nuclear layer.

554

555 Figure 3. LRIT3 and pikachurin are expressed normally in the OPL of *Grm6*<sup>-/-</sup>, *Gpr179*<sup>nob5</sup> and *Trpm1*<sup>-/-</sup>  
556 mouse retinas. Retinas from control, *Lrit3*<sup>-/-</sup>, *Grm6*<sup>-/-</sup>, *Gpr179*<sup>nob5</sup> and *Trpm1*<sup>-/-</sup> mouse retinas were  
557 immuno-stained for LRIT3 (green) and pikachurin (magenta). The merged images show that LRIT3 and  
558 pikachurin co-localize. Arrowheads indicate cone terminals. OPL, outer plexiform layer.

559  
560  
561 Figure 4. The visual responses of *Lrit3*<sup>-/-</sup> RGCs are significantly altered compared to controls and *Grm6*<sup>-/-</sup>  
562 <sup>-/-</sup>. **A**, Intensity response function of RGCs in control and *Lrit3*<sup>-/-</sup> RGCs. The break in the x-axis  
563 represents a 5 min light adaptation to 3.01 cd/m<sup>2</sup>. **B**, RGC functional classes in control, *Lrit3*<sup>-/-</sup> and  
564 *Grm6*<sup>-/-</sup> retinas. The total number of RGCs for each genotype is shown and the data were obtained from  
565 12 retinal pieces from 8 control mice; 16 retinal pieces from 6 *Lrit3*<sup>-/-</sup> mice; and 10 retinal pieces from 4  
566 *Grm6*<sup>-/-</sup> mice. There are significantly more (50%) visually non-responsive; defined as cells with  
567 spontaneous but no visually evoked activity, RGCs in the *Lrit3*<sup>-/-</sup> mice than either control or *Grm6*<sup>-/-</sup>.  
568 (Fishers exact test, p<0.001 for both comparisons). **C**, Representative average peristimulus time  
569 histograms (above - raster plots to individual stimulus presentation) of responses recorded on a  
570 multielectrode array to a full field light stimulus (303 cd/m<sup>2</sup>) on a 0.3 cd/m<sup>2</sup> background. **Ci**, Control  
571 RGC responses can be classified as ON, OFF and ON/OFF based on whether spiking peaks to light  
572 onset, offset or both, respectively. All responses occur < 0.4 sec after stimulus onset. **Cii** and **Ciii**, *Lrit3*<sup>-/-</sup>  
573 <sup>-/-</sup> and *Grm6*<sup>-/-</sup> RGC responses can be classified into the same general groups but the time to the peak  
574 response to light onset is > 0.4 sec and these responses are referred to as delayed ON (dON). Among  
575 visually responsive RGCs dON RGCs are only found in *Lrit3*<sup>-/-</sup> and *Grm6*<sup>-/-</sup> mutant retinas. **D**, The peak  
576 responses of OFF RGCs are decreased in *Lrit3*<sup>-/-</sup> and *Grm6*<sup>-/-</sup> compared to controls (median: 25 and 19  
577 Hz, respectively; compared to 38Hz in controls, Kruskal-Wallis followed by Dunn's test; p < 0.001 for  
578 both comparisons). **E**, Distribution of response latencies in the OFF RGCs in *Lrit3*<sup>-/-</sup> and *Grm6*<sup>-/-</sup> is not  
579 different than control (Kruskal-Wallis p=0.995). **F**, OFF responses in RGCs are mediated via kainate  
580 receptors. Responses show 37 RGCs peak response (sp/sec), before (32±1.6 SEM)), during (2.4±1.1)

581 and after ACET ( $20.11 \pm 1.1$ ) treatment. **G**, Fast Fourier transform to determine rhythmicity of the  
582 spontaneous activity of RGCs from *Lrit3*<sup>-/-</sup> and *Grm6*<sup>-/-</sup> RGCs. Data shows many *Lrit3*<sup>-/-</sup> cells exhibit  
583 rhythmic firing, whereas few do so in the *Grm6*<sup>-/-</sup> retinas.

584  
585 Figure 5. Three types of *Lrit3*<sup>-/-</sup> RGCs show decreased excitatory input to light stimuli. **A**, iGluSnFR  
586 expression in the GC, and ON and OFF sublaminae of the IPL following viral transduction with AAV2/1-  
587 *hsyn*-iGluSnFR. **B**, Visually-evoked changes in glutamate levels as detected by iGluSnFR fluorescence  
588 in the ON (top traces) and OFF (bottom traces) layers of the IPL for control (black traces) and *Lrit3*<sup>-/-</sup>  
589 (red traces), to a contrast reversing spot on a photopic background ( $1.2 \times 10^4$  R/rod and cone/s; 150  
590  $\mu\text{m}$  diameter, 1Hz square wave, 100% Michelson contrast). **C**, Quantification of the change in  
591 iGluSnFR fluorescence in the ON and OFF sublaminae of control and *Lrit3*<sup>-/-</sup> retinas for all recorded  
592 areas (ON, control n = 9, *Lrit3*<sup>-/-</sup> n = 8; OFF, control n = 5, *Lrit3*<sup>-/-</sup> n = 11). **D**, Electrophysiological whole-  
593 cell recordings of light-evoked current responses of three identified ganglion cell types (same stimulus  
594 as in **B**, except diameter 350  $\mu\text{m}$ ; recorded in voltage clamp mode at the reversal potential for chloride,  
595 -69 mV). **E**, Quantification of the light-evoked current response amplitude for all recorded cells. ON and  
596 OFF response amplitudes were computed as the mean of the recorded current following a light  
597 increment and decrement, respectively (light and dark gray regions in **D**). For all responses the  
598 amplitude of the excitatory (inward) current is inverted for ease of interpretation. Data were compared  
599 using a t-test, \*  $p < 0.05$ .

600  
601 Figure 6. *Lrit3*<sup>-/-</sup> rod BCs lack functional TRPM1 responses and BC1 cells have decreased excitatory  
602 input. **A**, Patch clamp recordings from rod BC from control, *Lrit3*<sup>-/-</sup> and *Trpm1*<sup>-/-</sup> mice in response to  
603 puffs of the mGluR6 antagonist CPPG (3mM). Summary data from multiple cells shows a dramatically  
604 decreased response in *Lrit3*<sup>-/-</sup> and *Trpm1*<sup>-/-</sup> cells, consistent with absence of the ERG b-wave in these  
605 knockouts. (\*\*\*) ANOVA,  $F(2,30)$ ,  $p < 0.001$ , Tukey post-hoc tests,  $P < 0.001$  for control vs both  
606 knockouts). **B**, Responses of BC1 cells to kainate puffs (50 $\mu\text{m}$ ) in retinal slices from control and *Lrit3*<sup>-/-</sup>



607 retinas. The summary data shows there is no difference in the maximal responses between the two  
608 genotypes (t-test,  $p=0.67$ ). **C**, Electrophysiological whole-cell recordings of a genetically identified BC1  
609 cells in control (top) and *Lrit3*<sup>-/-</sup> (bottom) mouse whole-mount retina. Traces represent the current  
610 recorded in voltage clamp mode at different holding potentials ( $E_{Cl} = -69$  mV;  $E_{cat} = 0$  mV). *Lrit3*<sup>-/-</sup>  
611 showed a marked absence of excitatory current (lower traces). **D**, Light-evoked excitatory current  
612 response of an example control and *Lrit3*<sup>-/-</sup> BC1. Traces show the average response to nine repeats of  
613 the square wave, contrast-reversing spot stimulus presented on a photopic background ( $1.2 \cdot 10^4$   
614  $R^*$ //rod and cone//s; 150  $\mu$ m diameter, 1Hz square wave, 100% Michelson contrast). **E**, Quantification  
615 of the excitatory current response for all recorded BC1 cells (data partially shown in **D**). **F, G**, As **D** and  
616 **E**, for membrane voltage response recorded in current clamp mode. Statistics in **E, G**, t-test.

617

618

### 619 **Extended Figure Legend**

620

621 Figure 2-1. The absence of LRIT3 has differential effects on rod and cone DBC signalplexes.  
622 Immunohistochemical staining for GPR179, mGluR6, G $\beta$ 5, RGS7, RGS11 and R9AP show punctate  
623 staining at the dendritic tips of both rod and cone (large clusters at the base of the OPL and indicated  
624 by arrowheads) DBCs in control mice. In *Lrit3*<sup>-/-</sup> mice these proteins are localized to the rod DBC  
625 dendritic tips but are absent from the cone DBCs. Note the lack of the large clusters at the base of the  
626 OPL. Scale bar = 5 $\mu$ m. OPL, outer plexiform layer; INL, inner nuclear layer.

627

628

629

Table 1. Immunohistochemical reagents used in experiments

| Antigen    | Dilution | Source                       | Catalogue # / reference       |
|------------|----------|------------------------------|-------------------------------|
| LRIT3      | 1:1000   | In house                     | Current paper                 |
| GPR179     | 1:2000   | In house                     | (Peachey et al., 2012)        |
| TRPM1      | 1:1000   | In house                     | Current paper                 |
| Pikachurin | 1:2000   | Wako Chemicals, Richmond, VA | 011-22631;(Sato et al., 2008) |
| mGluR6     | 1:2000   | Gift, Dr. Kirill Martemyanov | (Cao et al., 2011)            |

630

631

632 REFERENCES

- 633 Ball S, Pardue M, McCall M, Gregg R, Peachey N (2003) Immunohistochemical Analysis of the Outer  
634 Plexiform Layer in the Nob Mouse. *Investigative Ophthalmology and Visual Science* 44:1865.
- 635 Ball SL, Powers PA, Shin H-S, Morgans CW, Peachey NS, Gregg RG (2002) Role of the  $\beta 2$  subunit of  
636 voltage-dependent calcium channels in the retinal outer plexiform layer. *Investigative  
637 ophthalmology & visual science* 43:1595-1603.
- 638 Borghuis BG, Marvin JS, Looger LL, Demb JB (2013) Two-photon imaging of nonlinear glutamate  
639 release dynamics at bipolar cell synapses in the mouse retina. *J Neurosci* 33:10972-10985.
- 640 Borghuis BG, Looger LL, Tomita S, Demb JB (2014) Kainate receptors mediate signaling in both  
641 transient and sustained OFF bipolar cell pathways in mouse retina. *J Neurosci* 34:6128-  
642 6139.
- 643 Cao Y, Posokhova E, Martemyanov KA (2011) TRPM1 forms complexes with nyctalopin in vivo and  
644 accumulates in postsynaptic compartment of ON-bipolar neurons in mGluR6-dependent  
645 manner. *J Neurosci* 31:11521-11526.
- 646 Chang B, Heckenlively JR, Bayley PR, Brecha NC, Davisson MT, Hawes NL, Hirano AA, Hurd RE, Ikeda  
647 A, Johnson BA, McCall MA, Morgans CW, Nusinowitz S, Peachey NS, Rice DS, Vessey KA,  
648 Gregg RG (2006) The nob2 mouse, a null mutation in *Cacna1f*: anatomical and functional  
649 abnormalities in the outer retina and their consequences on ganglion cell visual responses.  
650 *Vis Neurosci* 23:11-24.
- 651 Demas J, Sagdullaev BT, Green E, Jaubert-Miazza L, McCall MA, Gregg RG, Wong RO, Guido W (2006)  
652 Failure to Maintain Eye-Specific Segregation in *nob*, a Mutant with Abnormally  
653 Patterned Retinal Activity. *Neuron* 50:247-259.
- 654 DeVries SH, Schwartz EA (1999) Kainate receptors mediate synaptic transmission between cones  
655 and 'Off' bipolar cells in a mammalian retina. *Nature* 397:157-160.

- 656 Ghosh KK, Bujan S, Haverkamp S, Feigenspan A, Wassle H (2004) Types of bipolar cells in the  
657 mouse retina. *J Comp Neurol* 469:70-82.
- 658 Gregg R, McCall M, Peachey N (2005) Bipolar specific expression of nyctalopin fusion gene rescues  
659 No-B wave phenotype in Nob mice. *Investigative Ophthalmology and Visual Science* 46:3554.
- 660 Gregg R, Lukasiewicz P, Peachey N, Sagdullaev B, McCall M (2003) Nyctalopin is required for  
661 signaling through depolarizing bipolar cells in the murine retina. *Investigative*  
662 *Ophthalmology and Visual Science* 44:4180.
- 663 Gregg RG, Ray TA, Hasan N, McCall MA, Peachey NS (2014) Interdependence among members of the  
664 mGluR6 G-protein mediated signalplex of retinal depolarizing bipolar cells. In: *G-protein*  
665 *signaling mechanisms in the retina* (Martemyanov KA, Sampath AP, eds), pp 67-79. New  
666 York: Springer.
- 667 Haeseleer F, Imanishi Y, Maeda T, Possin DE, Maeda A, Lee A, Rieke F, Palczewski K (2004) Essential  
668 role of Ca<sup>2+</sup>-binding protein 4, a Cav1.4 channel regulator, in photoreceptor synaptic  
669 function. *Nat Neurosci* 7:1079-1087.
- 670 Hasan N, Ray TA, Gregg RG (2016) CACNA1S Expression in Mouse Retina: Novel Isoforms and  
671 Antibody Cross Reactivity with GPR179. *Visual Neuroscience* In Press.
- 672 Hoon M, Sinha R, Okawa H, Suzuki SC, Hirano AA, Brecha N, Rieke F, Wong RO (2015)  
673 Neurotransmission plays contrasting roles in the maturation of inhibitory synapses on  
674 axons and dendrites of retinal bipolar cells. *Proc Natl Acad Sci U S A* 112:12840-12845.
- 675 Ichinose T, Hellmer CB (2016) Differential signalling and glutamate receptor compositions in the  
676 OFF bipolar cell types in the mouse retina. *J Physiol* 594:883-894.
- 677 Kaneko A, Saito T (1983) Ionic mechanisms underlying the responses of off-center bipolar cells in  
678 the carp retina. II. Studies on responses evoked by transretinal current stimulation. *J Gen*  
679 *Physiol* 81:603-612.

680 Koike C, Numata T, Ueda H, Mori Y, Furukawa T (2010) TRPM1: A vertebrate TRP channel  
681 responsible for retinal ON bipolar function. *Cell Calcium* 48:95-101.

682 Mansergh F, Orton NC, Vessey JP, Lalonde MR, Stell WK, Tremblay F, Barnes S, Rancourt DE, Bech-  
683 Hansen NT (2005) Mutation of the calcium channel gene *Cacna1f* disrupts calcium signaling,  
684 synaptic transmission and cellular organization in mouse retina. *Hum Mol Genet* 14:3035-  
685 3046.

686 Masu M, Iwakabe H, Tagawa Y, Miyoshi T, Yamashita M, Fukuda Y, Sasaki H, Hiroi K, Nakamura Y,  
687 Shigemoto R, et al. (1995) Specific deficit of the ON response in visual transmission by  
688 targeted disruption of the *mGluR6* gene. *Cell* 80:757-765.

689 Misgeld T, Kerschensteiner M, Bareyre FM, Burgess RW, Lichtman JW (2007) Imaging axonal  
690 transport of mitochondria in vivo. *Nature methods* 4:559-561.

691 Morgans CW, Zhang J, Jeffrey BG, Nelson SM, Burke NS, Duvoisin RM, Brown RL (2009) TRPM1 is  
692 required for the depolarizing light response in retinal ON-bipolar cells. *Proc Natl Acad Sci U*  
693 *S A* 106:19174-19178.

694 Nawy S (2004) Desensitization of the *mGluR6* transduction current in tiger salamander On bipolar  
695 cells. *J Physiol* 558:137-146.

696 Neuille M, Morgans CW, Cao Y, Orhan E, Michiels C, Sahel JA, Audo I, Duvoisin RM, Martemyanov KA,  
697 Zeitz C (2015) *LRIT3* is essential to localize TRPM1 to the dendritic tips of depolarizing  
698 bipolar cells and may play a role in cone synapse formation. *Eur J Neurosci* 42:1966-1975.

699 Neuille M, El Shamieh S, Orhan E, Michiels C, Antonio A, Lancelot ME, Condroyer C, Bujakowska K,  
700 Poch O, Sahel JA, Audo I, Zeitz C (2014) *Lrit3* deficient mouse (*nob6*): a novel model of  
701 complete congenital stationary night blindness (cCSNB). *PLoS One* 9:e90342.

702 Neuille M, Cao Y, Caplette R, Guerrero-Given D, Thomas C, Kamasawa N, Sahel JA, Hamel CP, Audo I,  
703 Picaud S, Martemyanov KA, Zeitz C (2017) *LRIT3* Differentially Affects Connectivity and

704           Synaptic Transmission of Cones to ON- and OFF-Bipolar Cells. *Invest Ophthalmol Vis Sci*  
705           58:1768-1778.

706   Pardue MT, McCall MA, LaVail MM, Gregg RG, Peachey NS (1998) A naturally occurring mouse  
707           model of X-linked congenital stationary night blindness. *Invest Ophthalmol Vis Sci* 39:2443-  
708           2449.

709   Peachey NS, Hasan N, FitzMaurice B, Burrill S, Pangeni G, Karst SY, Reinholdt L, Berry ML, Strobel M,  
710           Gregg RG, McCall MA, Chang B (2017a) A Missense Mutation in *Grm6* Reduces but Does Not  
711           Eliminate *Mglur6* Expression or Rod Depolarizing Bipolar Cell Function. *J Neurophysiol*:jn  
712           00888 02016.

713   Peachey NS, Hasan N, FitzMaurice B, Burrill S, Pangeni G, Karst SY, Reinholdt L, Berry ML, Strobel M,  
714           Gregg RG, McCall MA, Chang B (2017b) A missense mutation in *Grm6* reduces but does not  
715           eliminate *mGluR6* expression or rod depolarizing bipolar cell function. *J Neurophysiol*  
716           118:845-854.

717   Peachey NS et al. (2012) GPR179 is required for depolarizing bipolar cell function and is mutated in  
718           autosomal-recessive complete congenital stationary night blindness. *Am J Hum Genet*  
719           90:331-339.

720   Pearing JN, Bojang P, Jr., Shen Y, Koike C, Furukawa T, Nawy S, Gregg RG (2011) A role for  
721           nyctalopin, a small leucine-rich repeat protein, in localizing the TRP melastatin 1 channel to  
722           retinal depolarizing bipolar cell dendrites. *J Neurosci* 31:10060-10066.

723   Pinto LH et al. (2007) Generation, identification and functional characterization of the *nob4*  
724           mutation of *Grm6* in the mouse. *Vis Neurosci* 24:111-123.

725   Ray TA (2013) *Ph.D. Thesis*. Constructing the rod bipolar signalplex using animal models of retinal  
726           dysfunction. <https://ir.library.louisville.edu/etd/1188/>. In.

- 727 Ray TA, Heath KM, Hasan N, Noel JM, Samuels IS, Martemyanov KA, Peachey NS, McCall MA, Gregg  
728 RG (2014) GPR179 is required for high sensitivity of the mGluR6 signaling cascade in  
729 depolarizing bipolar cells. *J Neurosci* 34:6334-6343.
- 730 Renteria RC, Tian N, Cang J, Nakanishi S, Stryker MP, Copenhagen DR (2006) Intrinsic ON responses  
731 of the retinal OFF pathway are suppressed by the ON pathway. *J Neurosci* 26:11857-11869.
- 732 Saito T, Kaneko A (1983) Ionic mechanisms underlying the responses of off-center bipolar cells in  
733 the carp retina. I. Studies on responses evoked by light. *J Gen Physiol* 81:589-601.
- 734 Sato S, Omori Y, Katoh K, Kondo M, Kanagawa M, Miyata K, Funabiki K, Koyasu T, Kajimura N,  
735 Miyoshi T, Sawai H, Kobayashi K, Tani A, Toda T, Usukura J, Tano Y, Fujikado T, Furukawa T  
736 (2008) Pikachurin, a dystroglycan ligand, is essential for photoreceptor ribbon synapse  
737 formation. *Nat Neurosci* 11:923-931.
- 738 Shen Y, Heimel JA, Kamermans M, Peachey NS, Gregg RG, Nawy S (2009) A transient receptor  
739 potential-like channel mediates synaptic transmission in rod bipolar cells. *J Neurosci*  
740 29:6088-6093.
- 741 Slaughter MM, Miller RF (1983) An excitatory amino acid antagonist blocks cone input to sign-  
742 conserving second-order retinal neurons. *Science* 219:1230-1232.
- 743 Takeuchi H, Horie S, Moritoh S, Matsushima H, Hori T, Kimori Y, Kitano K, Tsubo Y, Tachibana M,  
744 Koike C (2018) Different Activity Patterns in Retinal Ganglion Cells of TRPM1 and mGluR6  
745 Knockout Mice. *Biomed Res Int* 2018:2963232.
- 746 Wassle H, Puller C, Muller F, Haverkamp S (2009) Cone contacts, mosaics, and territories of bipolar  
747 cells in the mouse retina. *J Neurosci* 29:106-117.
- 748 Wycisk KA, Budde B, Feil S, Skosyrski S, Buzzi F, Neidhardt J, Glaus E, Nurnberg P, Ruether K, Berger  
749 W (2006) Structural and functional abnormalities of retinal ribbon synapses due to  
750 *Cacna2d4* mutation. *Invest Ophthalmol Vis Sci* 47:3523-3530.

751 Zeitz C et al. (2013) Whole-exome sequencing identifies LRIT3 mutations as a cause of autosomal-  
752 recessive complete congenital stationary night blindness. Am J Hum Genet 92:67-75.  
753



# Figure 1

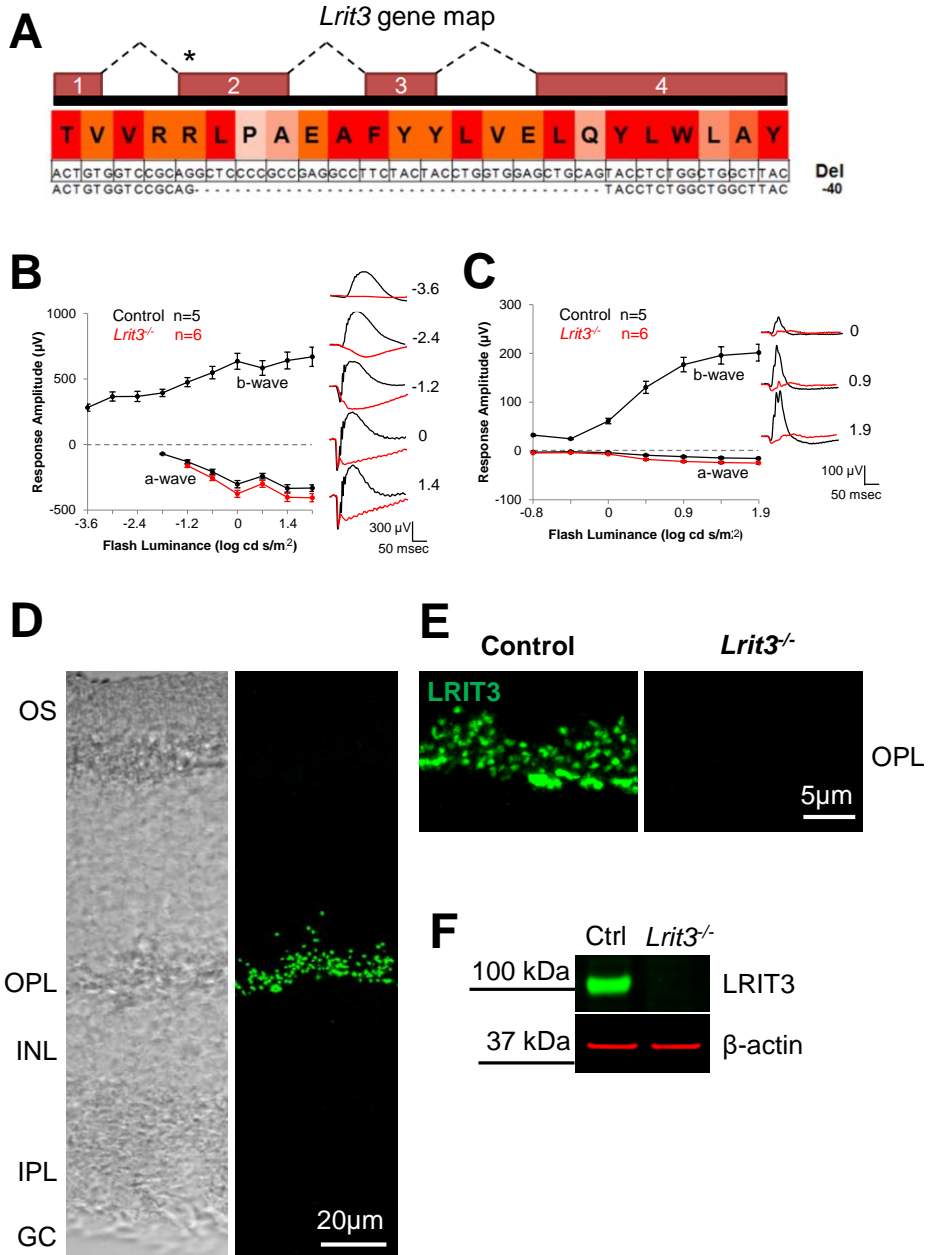

Figure 2

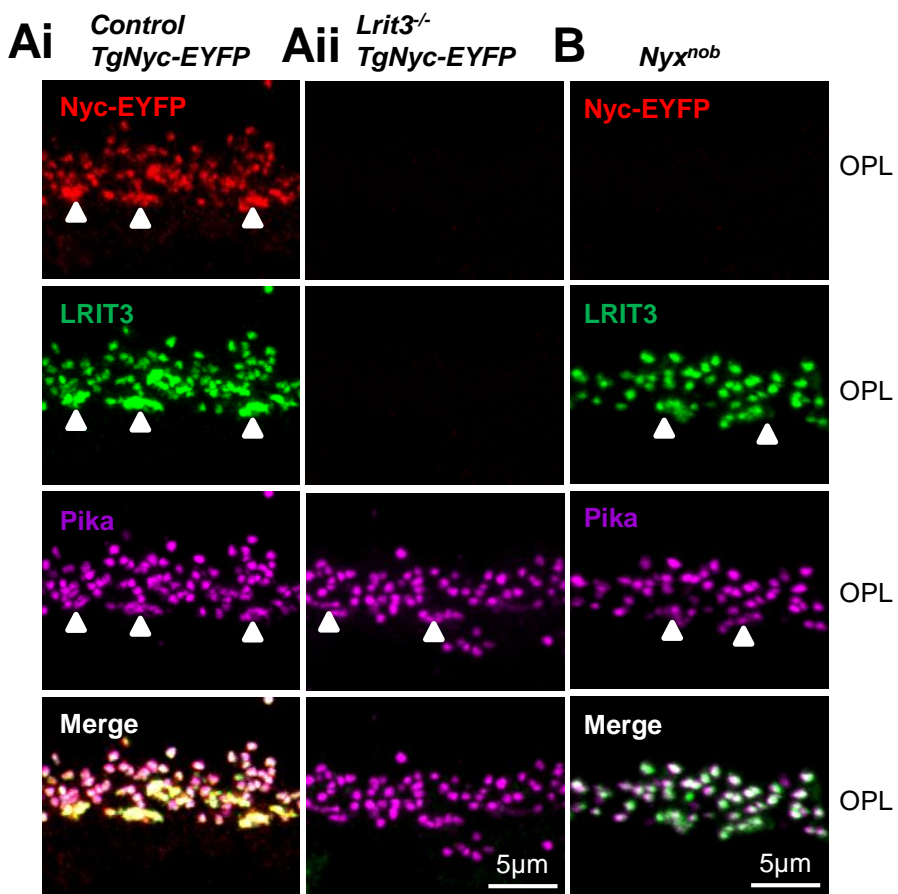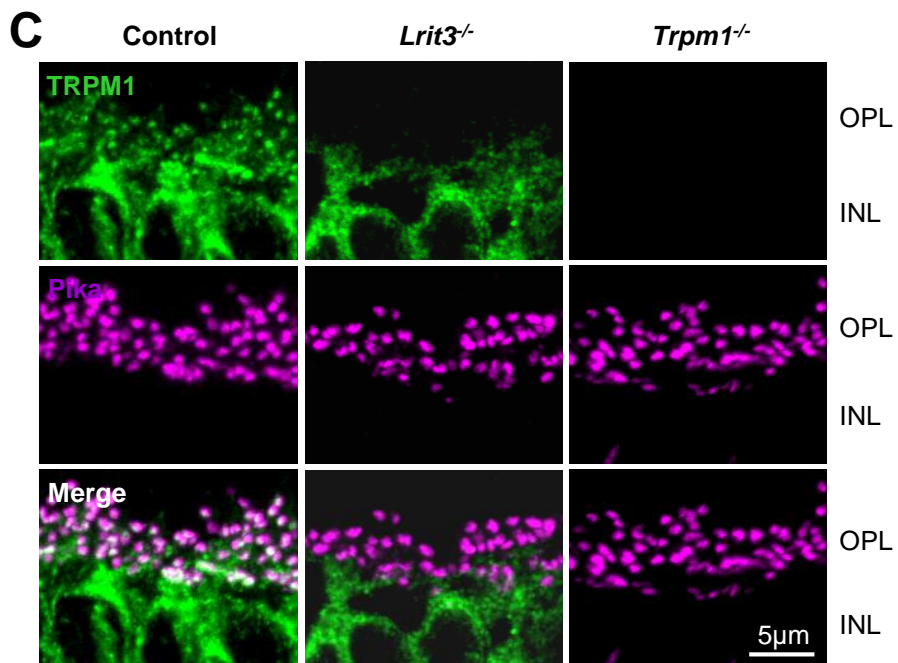

Figure 3

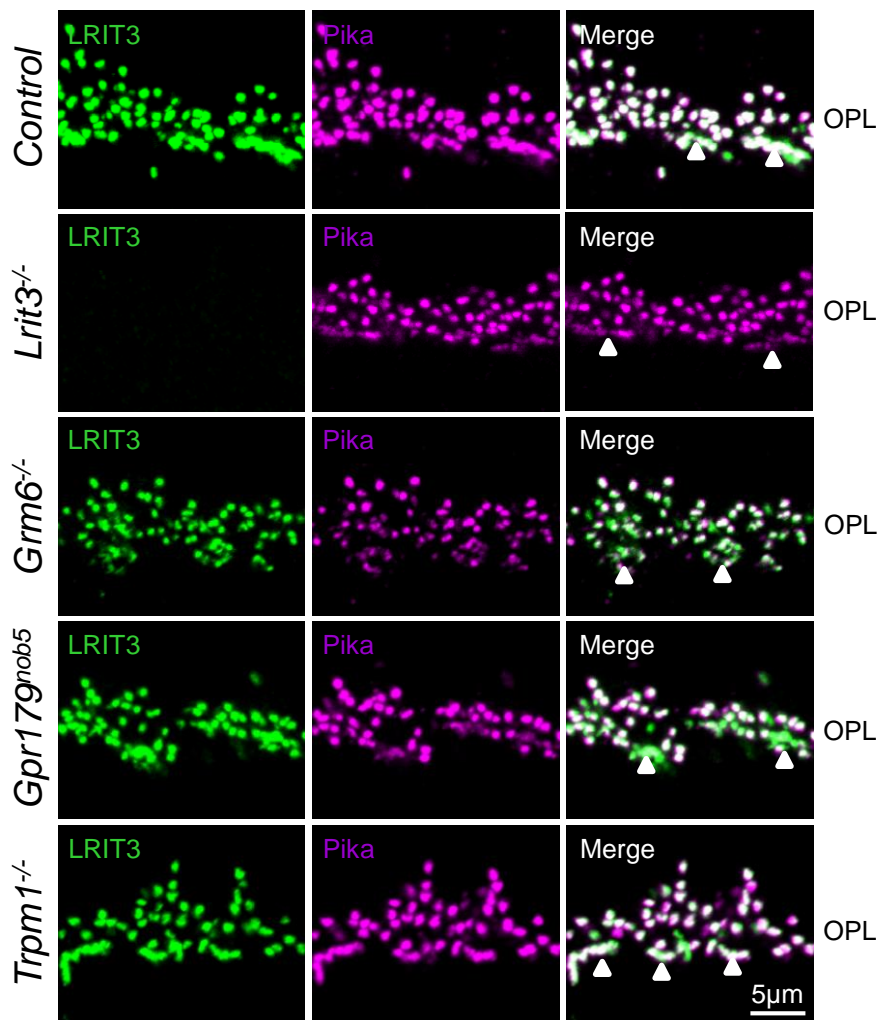

Figure 4.

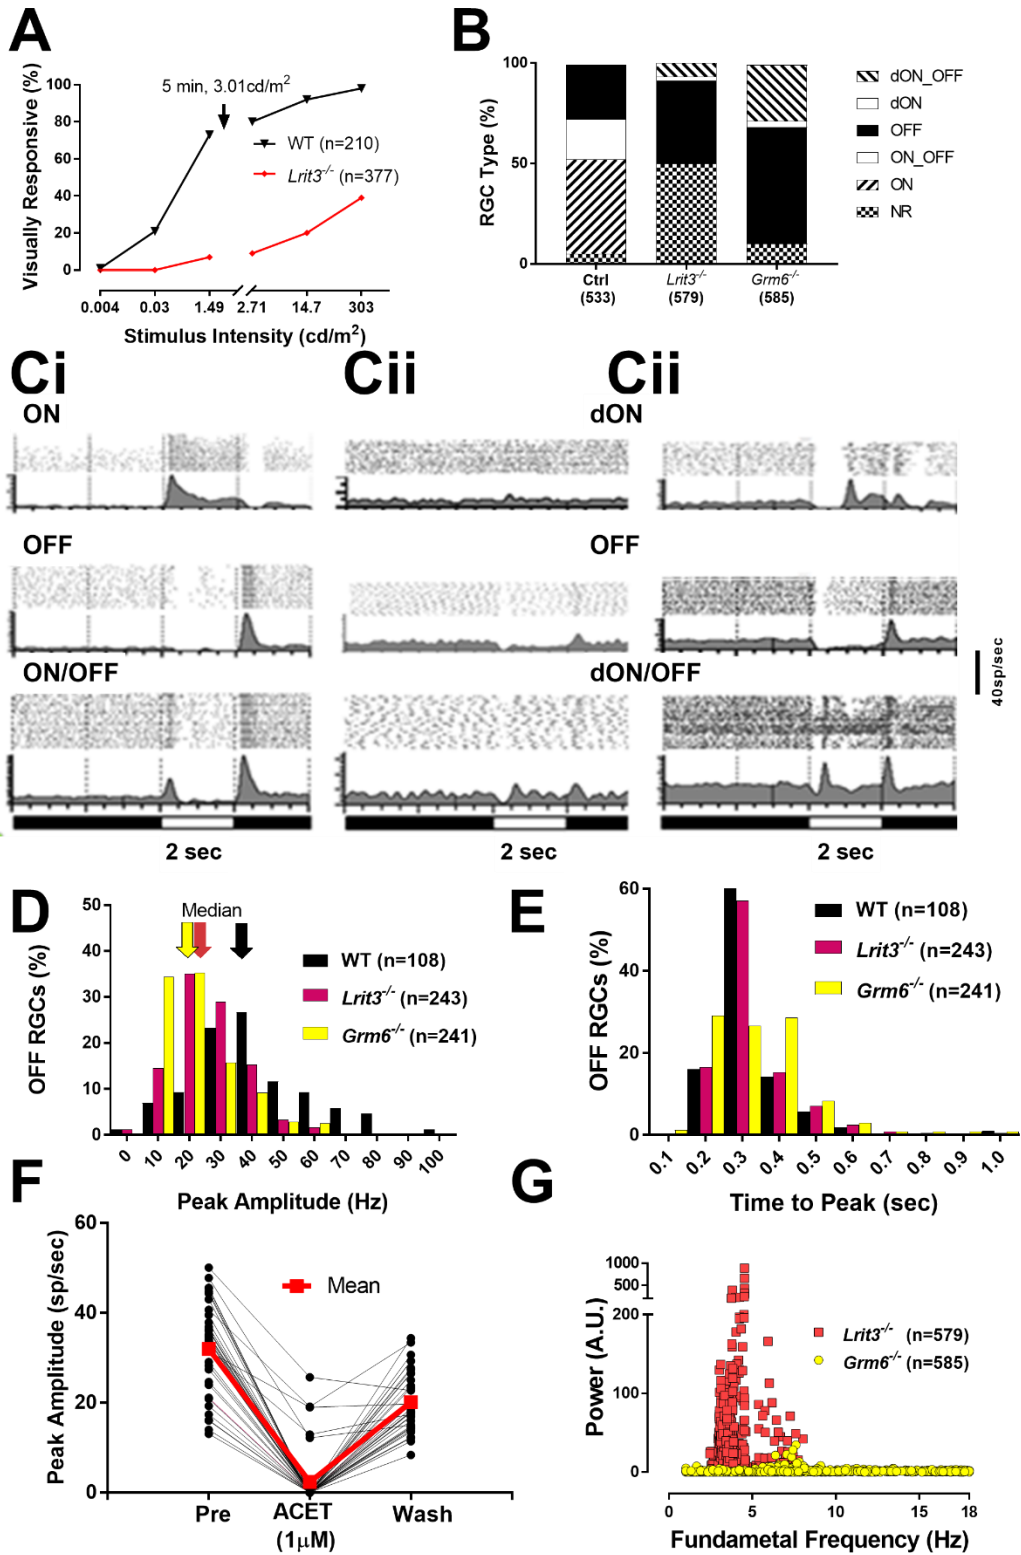

Figure 5.

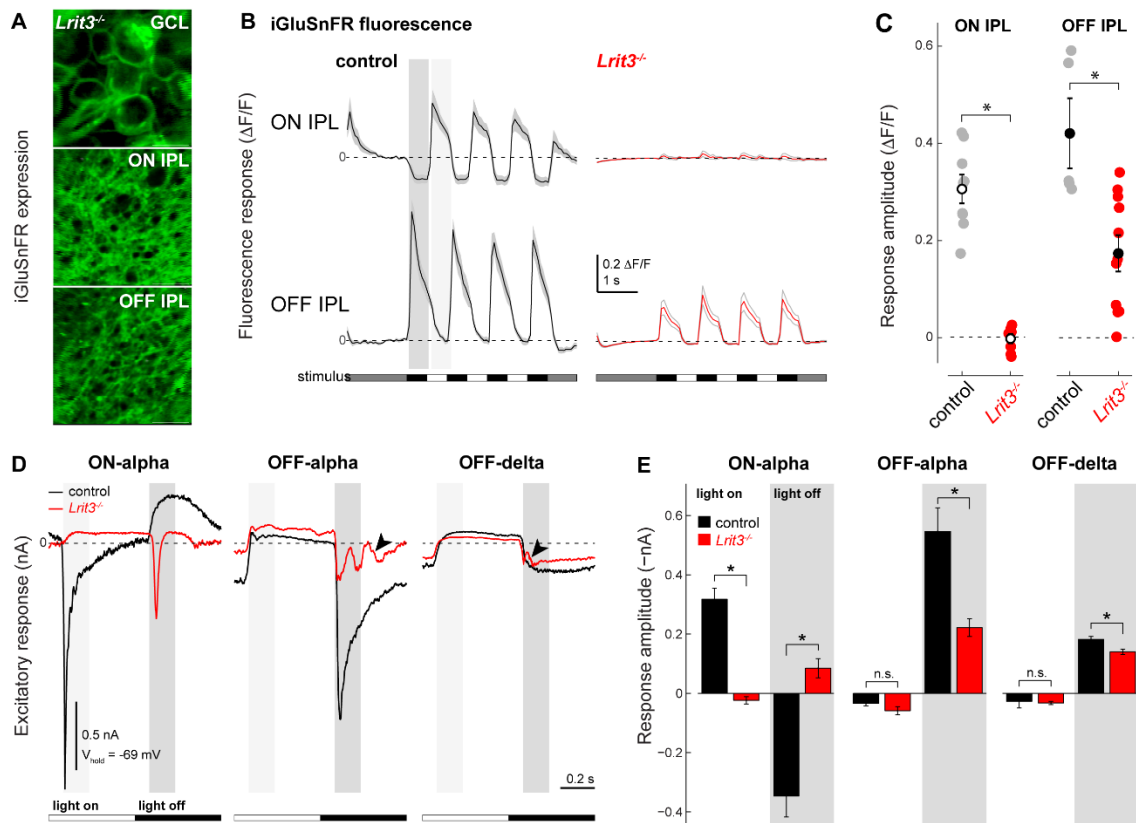

# Figure 6

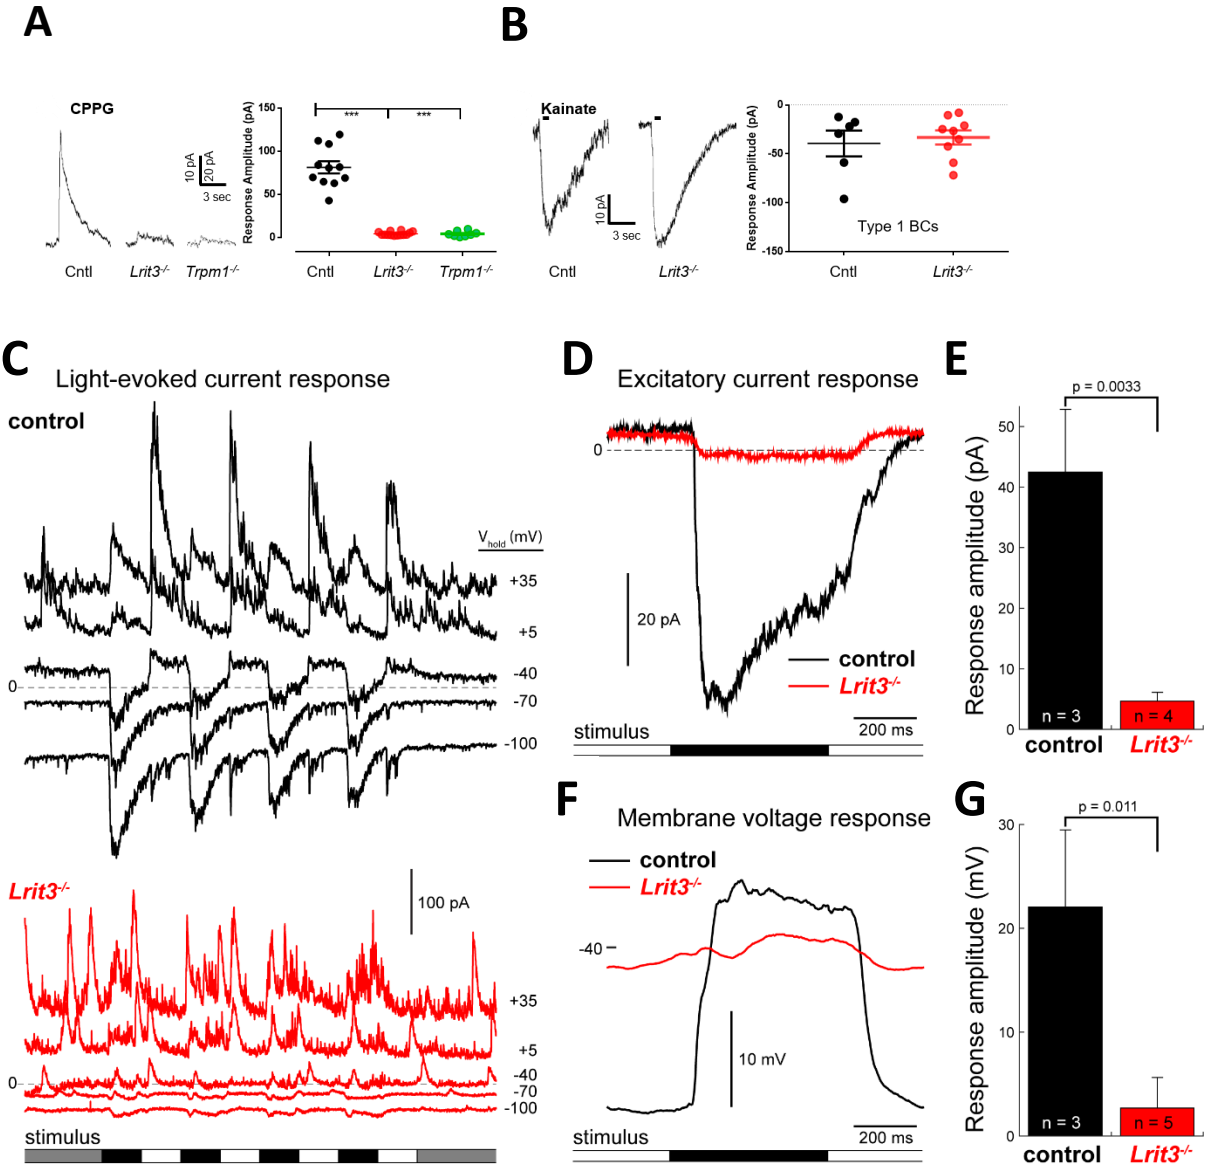

Figure 2-1

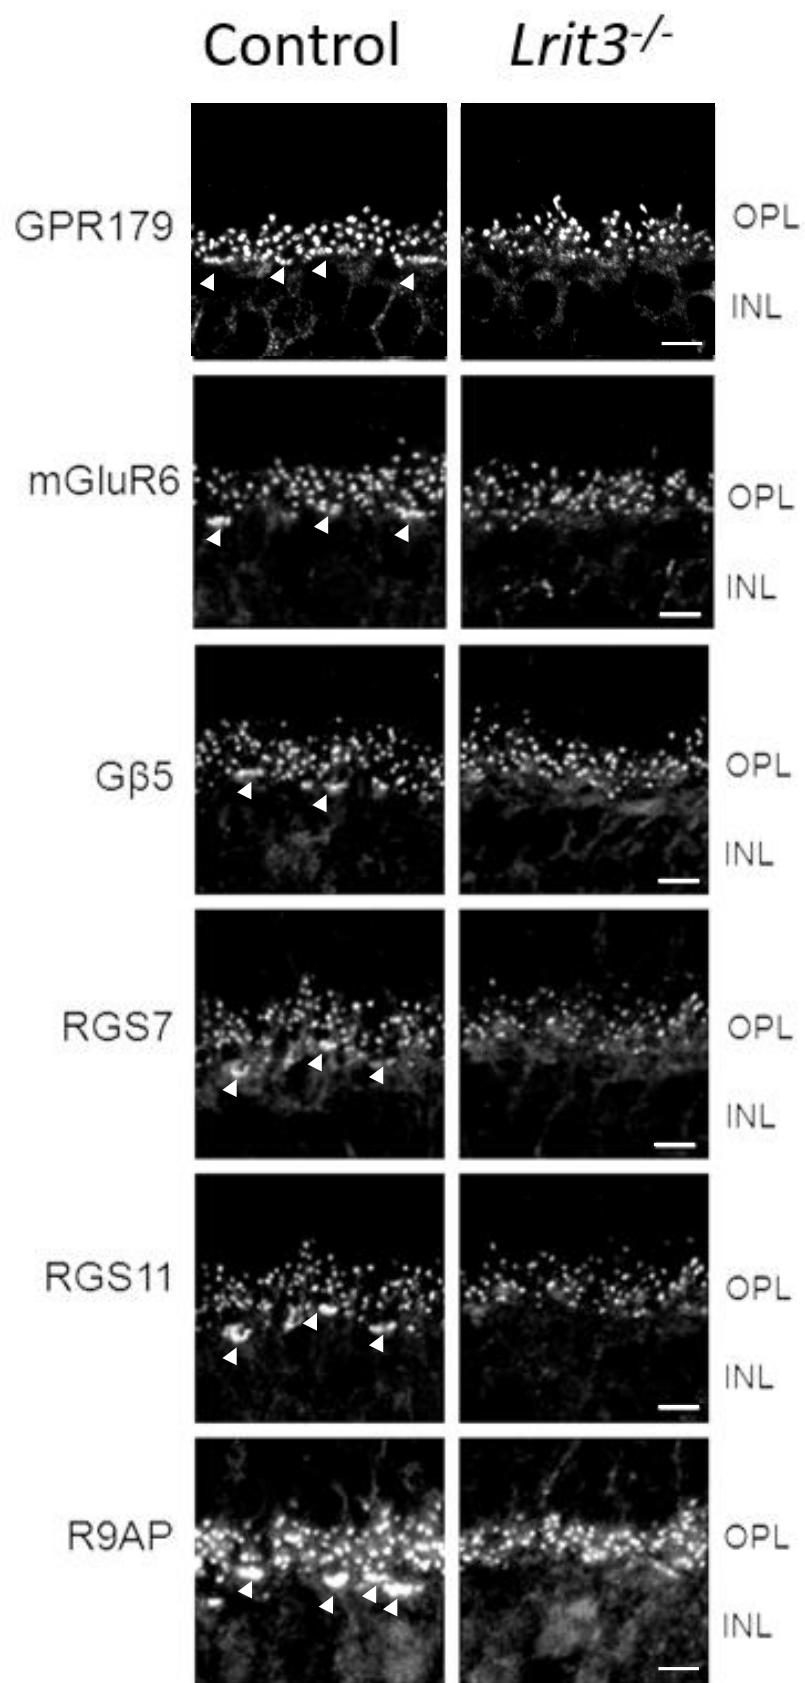

Source: https://www.biorxiv.org/content/10.1101/431338v1.full.pdf
